# Supplementary material for: Cellcano: supervised cell type identification for single cell ATAC-seq data
Source: PubMed Central journal article supplement (PMC10070275; doi:10.1038/s41467-023-37439-3), 2023-04-03
Supplement: 41467_2023_37439_MOESM3_ESM.pdf [file 41467_2023_37439_MOESM3_ESM.pdf]

## **Description of Additional Supplementary Files**

**Title:** Supplementary Dataset 1

**Description:** Supplementary table describes 29 human PBMCs celltyping tasks designed for this study.

**Title:** Supplementary Dataset 2

**Description:** Supplementary table describes 21 mouse brain celltyping tasks designed for this study.
